# Supplementary material
Source: PubMed Central journal article supplement (PMC6552437)
Supplement: supp_RA119.007997_143719_1_supp_312217_ppnmgx.pdf [file supp_RA119.007997_143719_1_supp_312217_ppnmgx.pdf]

**A**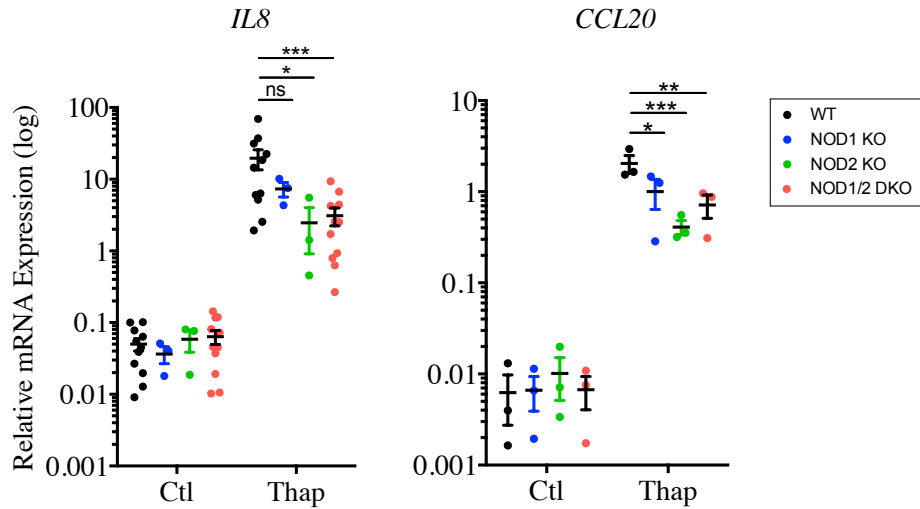**B**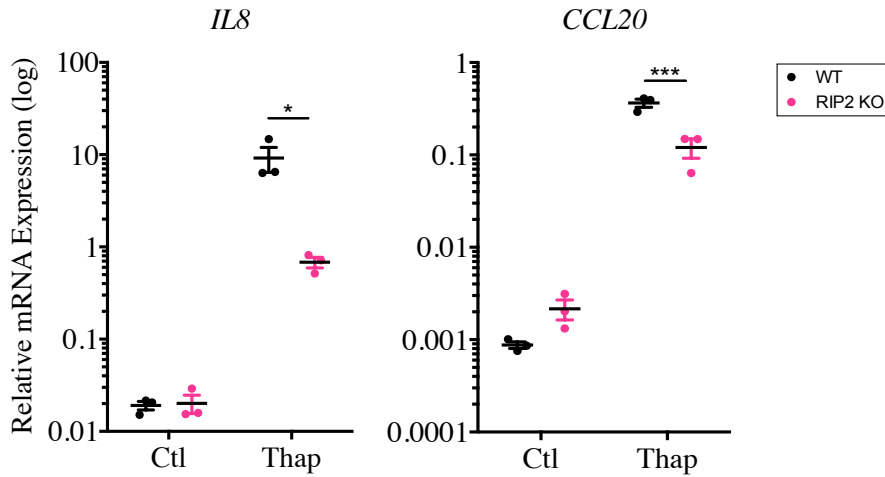

**Figure S1. Thapsigargin induces pro-inflammatory cytokine expression in a NOD-dependent manner (A-B)** Expression of *IL8* and *CCL20* in wild type (WT), *NOD1* knockout (KO), *NOD2* KO and *NOD1/2* double KO (DKO) HCT116 cells (A) or WT and *RIPK2* KO HCT116 cells (B) following stimulation with 0.1mg/ml thapsigargin for 4 hours. Gene expression analysis was carried out by qRT-PCR. In all data sets, each point is from an independent experiment and is the average of three technical replicates. \*, \*\* and \*\*\* represents  $p < 0.05$ ,  $p < 0.01$  and  $p < 0.001$ , respectively. ns - not significant.

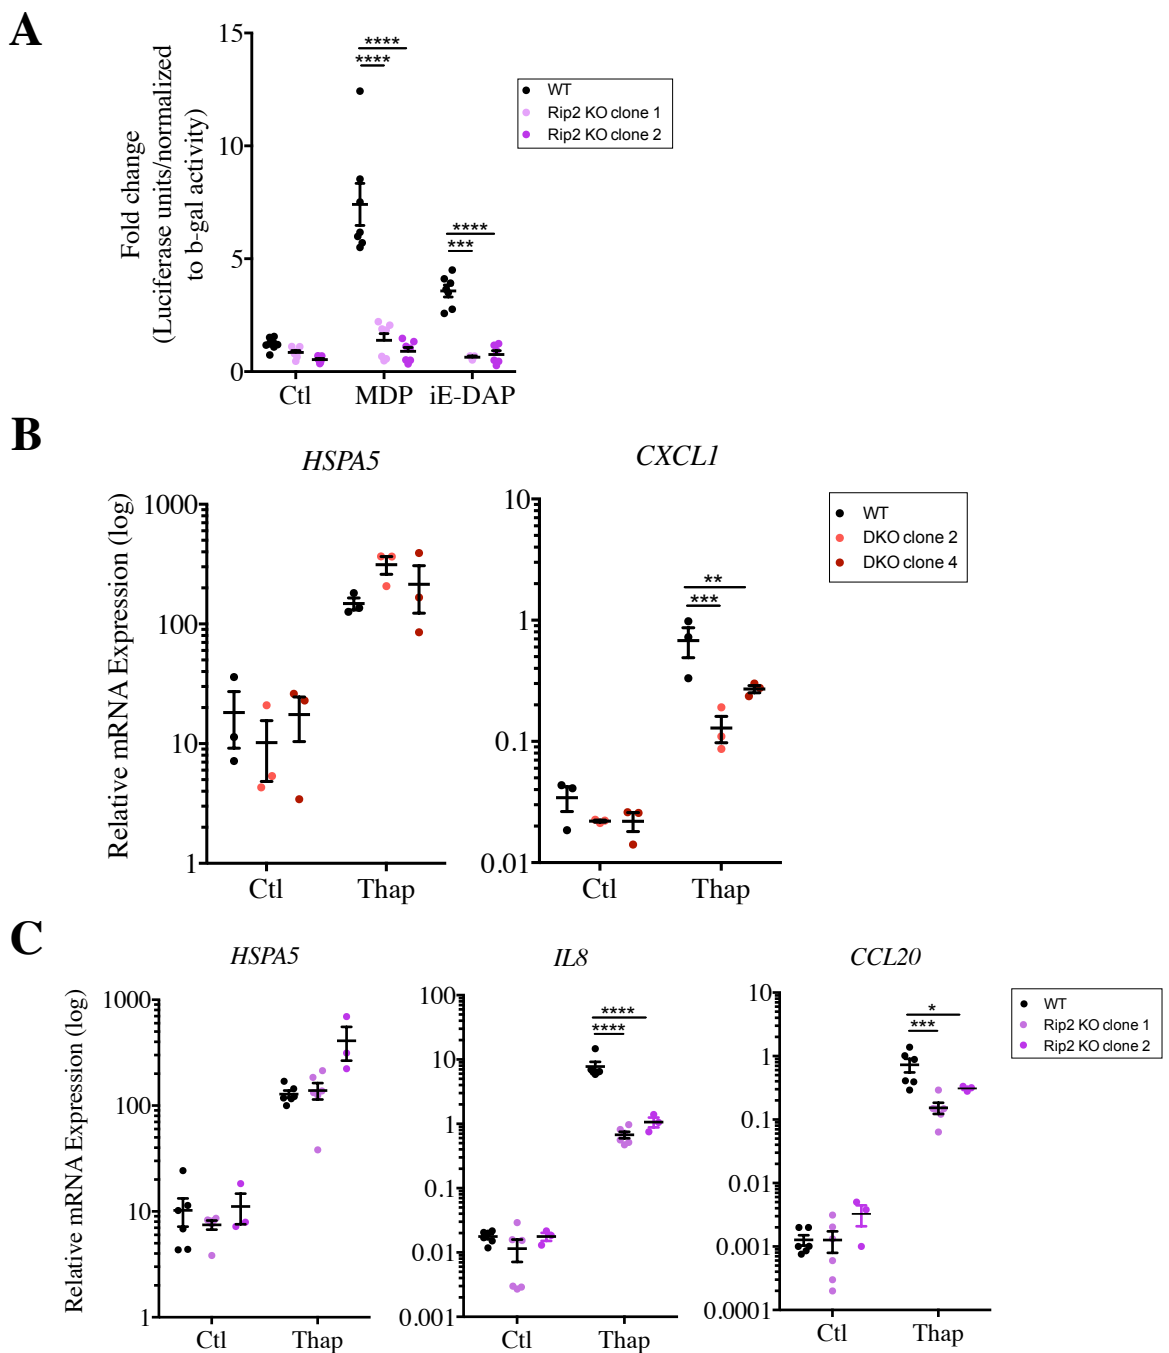

**Figure S2. Analysis of distinct clones of CRISPR KO HCT116 cells**

(A) Wild type (WT) or two distinct clones of *RIPK2* KO HCT116 cells were transfected overnight with Igk-Luci (NF- $\kappa$ B reporter construct) and b-galactosidase expressing construct in the presence or absence of 10mg/ml NOD ligands muramyl dipeptide (MDP) or iE-DAP. (B) Expression of *HSPA5* and *CXCL1* in wild type (WT) and two clones of *NOD1/2* double KO (DKO) HCT116 cells following stimulation with 0.1mg/ml thapsigargin for 4 hours measured by qRT-PCR. (C) Expression of *HSPA5*, *IL8* and *CCL20* in wild type (WT) and two clones of *RIPK2* KO HCT116 cells following stimulation with 0.1mg/ml thapsigargin for 4 hours. Gene expressions were measured by qRT-PCR. In all data sets, each point is from an independent experiment and is the average of three technical replicates. \*, \*\*\* and \*\*\*\* represents  $p < 0.05$ ,  $p < 0.001$  and  $p < 0.0001$ , respectively. ns - not significant.

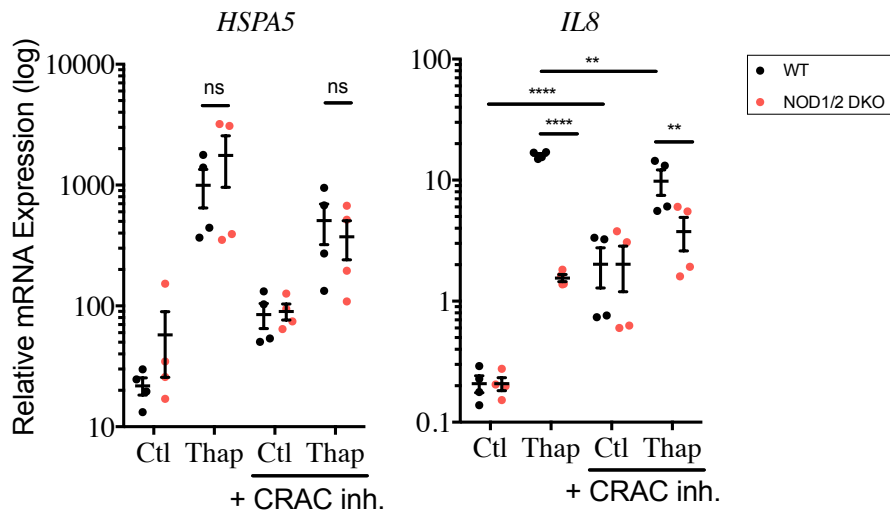

**Figure S3. Internalization of extracellular  $\text{Ca}^{2+}$  by CRAC channels contributes to NOD-dependent pro-inflammatory cytokine expression.**

Expression of *HSPA5* and *IL8* in wild type (WT) and *NOD1/2* double KO (DKO) HCT116 cells upon treatment with Thapsigargin (0.1mg/ml) in presence or absence of CRAC inhibitor, GSK7975A (10mM). Gene expression analysis was carried out by qRT-PCR. In all data sets, each point is from an independent experiment and is the average of two technical replicates. \*\* and \*\*\*\* represents  $p < 0.01$  and  $p < 0.0001$ , respectively. ns - not significant.

**A**

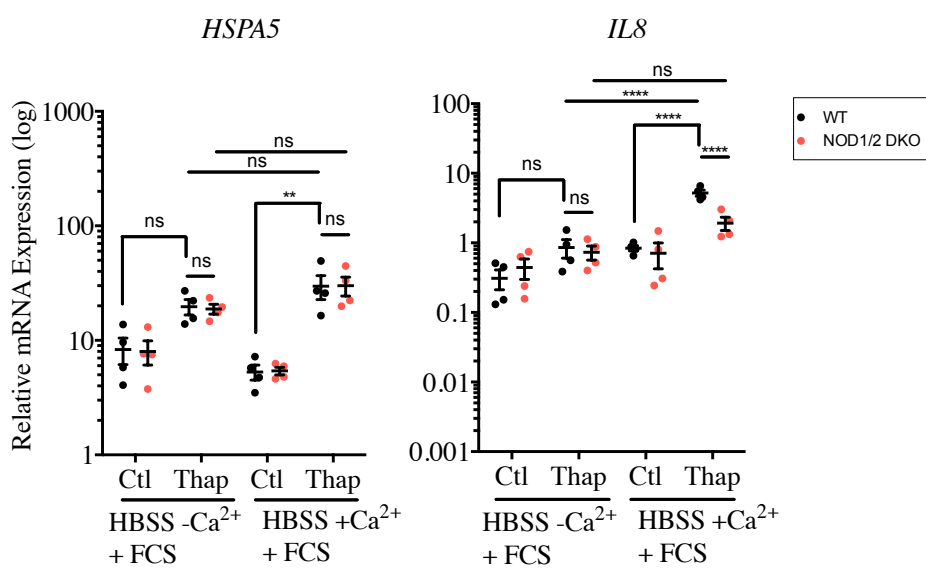

**B**

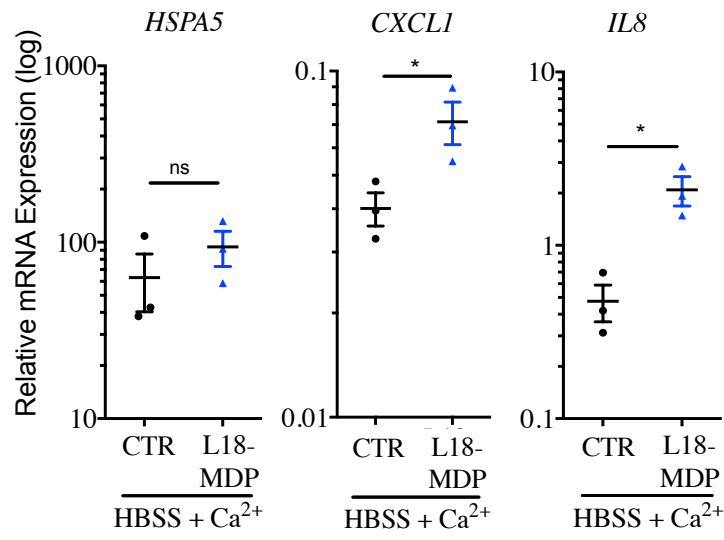

**C**

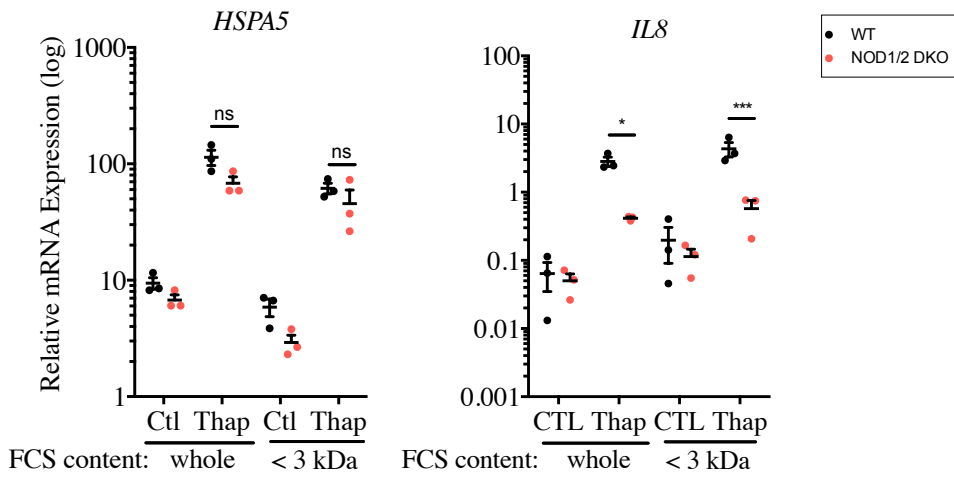

Figure S4

**Figure S4. Heat-resistant small molecules from cell culture serum trigger NOD-dependent activation of pro-inflammatory signalling induced by thapsigargin**

(A) Expression of *HSPA5* and *IL8* in wild type (WT) and *NOD1/2* double KO (DKO) HCT116 cells incubated overnight in Hanks' Balanced Salt Solution (HBSS) medium without  $\text{Ca}^{2+}$  in the presence or absence of 10% fecal calf serum (FCS) following stimulation with 0.1mg/ml thapsigargin for 4 hours. (B) Expression of *HSPA5* and *IL8* in wild type (WT) HCT116 cells cultured overnight in Hanks' Balanced Salt Solution (HBSS) medium supplemented with 140mg/ml  $\text{CaCl}_2$  in absence of 10% fecal calf serum (FCS), following stimulation with L-18 MDP (100ng/ml) for 4 hours (C) Expression of *HSPA5* and *IL8* in wild type (WT) and *NOD1/2* double KO (DKO) HCT116 cells incubated in DMEM supplemented with either normal 10% FCS (whole) or serum boiled for 10 minutes and filtered with a 3kDa filter, following stimulation with 0.1mg/ml thapsigargin for 4 hours. Gene expressions were measured by qRT-PCR. In all data sets, each point is from an independent experiment and is the average of three technical replicates. \*, \*\*, \*\*\* and \*\*\*\*,  $p < 0.05$ ,  $p < 0.01$ ,  $p < 0.001$  and  $p < 0.0001$ , respectively. ns - not significant.

| COMPOUND                                          | NEUTRAL FORMULA | M+H       | RT    | SAMPLE #A | SAMPLE #B |
|---------------------------------------------------|-----------------|-----------|-------|-----------|-----------|
| L-ALA-Γ-D-GLN-MDAP                                | C15H27N5O7      | 390.1983  | 9.57  | 1.00E+06  | 1.76E+05  |
| L-ALA-Γ-D-GLU-MDAP                                | C15H26N4O8      | 391.1823  | 14.56 |           | 4.27E+04  |
|                                                   |                 |           | 10.68 | 1.84E+06  | 1.39E+05  |
| L-ALA-D-GLN-LYS-D-ALA                             | C17H32N6O6      | 417.2456  | 8.53  | 7.51E+06  |           |
| L-ALA-D-GLU-LYS-D-ALA                             | C17H31N5O7      | 418.2296  |       |           |           |
| L-ALA-D-GLU-MESODAP-D-ALA                         | C18H31N5O9      | 462.2194  | 10.81 |           | 2.05E+05  |
| ANHYDROMURNAC-L-ALA-D-GLN                         | C19H30N4O10     | 475.2034  | 10.16 | 1.10E+05  |           |
| ANHYDROMURNAC-L-ALA-D-GLU                         | C19H29N3O11     | 476.1874  | 10.9  | 4.92E+05  | 2.05E+05  |
| L-ALA-D-GLN-LYS-D-ALA-D-ALA                       | C20H37N7O7      | 488.2827  |       |           |           |
| L-ALA-D-GLU-LYS-D-ALA-D-ALA                       | C20H36N6O8      | 489.2667  | 9.26  |           | 1.01E+06  |
| MURNAC-L-ALA-D-GLN                                | C19H32N4O11     | 493.2140  |       |           |           |
| MURNAC-L-ALA-D-GLU                                | C19H31N3O12     | 494.1980  |       |           |           |
| L-ALA-D-GLN-MESODAP-D-ALA-D-ALA                   | C21H37N7O9      | 532.2725  | 2.33  | 1.46E+07  | 5.20E+07  |
| L-ALA-D-GLU-MESODAP-D-ALA-D-ALA                   | C21H36N6O10     | 533.2565  |       |           |           |
|                                                   |                 |           | 9.02  | 5.10E+05  |           |
| ANHYDROMURNAC-L-ALA-D-GLU-LYS                     | C25H41N5O12     | 604.2824  |       |           | 6.95E+04  |
| MURNAC-L-ALA-D-GLU-LYS                            | C25H43N5O13     | 622.2930  |       |           | 1.62E+05  |
| MURNAC-L-ALA-D-GLN-MDAP                           | C26H44N6O14     | 665.2988  |       |           |           |
| GLCNAC-ANHYDROMURNAC-L-ALA-D-GLU                  | C27H42N4O16     | 679.2669  |       |           |           |
| GLCNAC-MURNAC-L-ALA-D-GLN                         | C27H45N5O16     | 696.2934  | 8.03  | 1.02E+06  |           |
| GLCNAC-MURNAC-L-ALA-D-GLU                         | C27H44N4O17     | 697.2774  |       |           |           |
| GLCNAC-ANHYDROMURNAC-L-ALA-D-GLN-MDAP             | C34H55N7O18     | 850.3676  |       |           |           |
| GLCNAC-MURNAC-L-ALA-D-GLN-MDAP                    | C34H57N7O19     | 868.3782  | 2.32  | 5.52E+06  | 4.87E+07  |
| GLCNAC-ANHYDROMURNAC-L-ALA-D-GLU-LYS-L-ALA        | C36H59N7O18     | 878.3989  | 1.41  | 7.25E+05  |           |
| GLCNAC-MURNAC-L-ALA-D-GLN-LYS-L-ALA               | C36H62N8O18     | 895.4255  |       |           |           |
| GLCNAC-ANHYDROMURNAC-L-ALA-D-GLN-MDAP-L-ALA       | C37H60N8O19     | 921.4047  |       |           |           |
| GLCNAC-ANHYDROMURNAC-L-ALA-D-GLU-MDAP-L-ALA       | C37H59N7O20     | 922.3888  |       |           | 6.63E+05  |
| GLCNAC-MURNAC-L-ALA-D-GLN-LYS-L-ALA-L-ALA         | C39H67N9O19     | 966.4626  |       |           |           |
| GLCNAC-MURNAC-L-ALA-D-GLU-LYS-L-ALA-L-ALA         | C39H66N8O20     | 967.4466  |       |           | 2.42E+06  |
| GlcNac-anhydroMurNac-L-Ala-D-Gln-mDAP-L-Ala-L-Ala | C40H65N9O20     | 992.4419  |       |           |           |
| GlcNac-anhydroMurNac-L-Ala-D-Glu-mDAP-L-Ala-L-Ala | C40H64N8O21     | 993.4259  |       |           |           |
| GlcNac-MurNac-L-Ala-D-Gln-mDAP-L-Ala-L-Ala        | C40H67N9O21     | 1010.4524 |       |           |           |
| GlcNac-MurNac-L-Ala-D-Glu-mDAP-L-Ala-L-Ala        | C40H66N8O22     | 1011.4364 |       |           |           |

**Figure S5. Analysis of peptidoglycan fragments in two fetal calf serum samples by LC-MS**  
List of the peptidoglycan fragments analyzed by LC-MS from two independent fetal calf serum samples. RT, retention time.

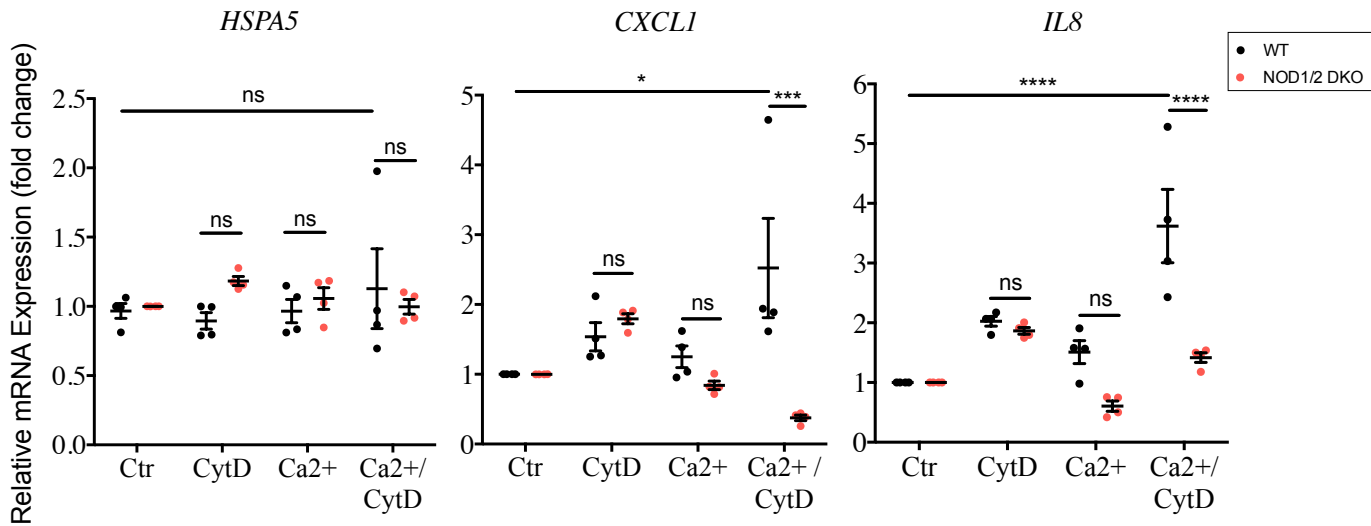

**Figure S6. Cytochalasin D triggers NOD-dependent expression of pro-inflammatory genes**

Expression of *HSPA5*, *CXCL1* and *IL8* in wild type (WT) and *NOD1/2* double KO (DKO) HCT116 cells incubated overnight in Hanks' Balanced Salt Solution (HBSS) medium supplemented with 10% fetal calf serum (FCS), in the absence or presence Ca<sup>2+</sup>, following stimulation with or without 5mM cytochalasin D (CytD) for 4 hours. Gene expressions were measured by qRT-PCR. In all data sets, each point is from an independent experiment and is the average of two technical replicates. \* and \*\*\*\*,  $p < 0.05$  and  $p < 0.0001$ , respectively. ns - not significant.
